# Supplementary material for: Ebola viral dynamics in nonhuman primates provides insights into virus immuno-pathogenesis and antiviral strategies
Source: PubMed Central journal article supplement (PMC6167368; doi:10.1038/s41467-018-06215-z), 2018-10-01
Supplement: 41467_2018_6215_MOESM4_ESM.pdf [file 41467_2018_6215_MOESM4_ESM.pdf]

## **Description of Additional Supplementary Files**

File Name: Supplementary Data 1

Description: Original data used in the modeling analysis.

File Name: Supplementary Software

Description: Mlxtran code of the final joint model of favipiravir pharmacokinetics and Ebola virus disease, used in Monolix software to fit the data and estimate model parameter values.
